# Supplementary material
Source: PubMed Central journal article supplement (PMC4846359)
Supplement: NIHMS777991-supplement-appendix.pdf [file NIHMS777991-supplement-appendix.pdf]

**Supplementary Appendix.** Diagnosis and procedure codes.

|                              | CPT                       | ICD-9-CM            |
|------------------------------|---------------------------|---------------------|
| <b>Nonfunctional Imaging</b> |                           |                     |
| Abdominal/Renal U/S          | 76700/70/75               | 87.75, 88.76        |
| MRI                          | 74181/2/3                 | 88.95, 88.97        |
| CT                           | 74150/60/70/76/77/78      | 88.01, 88.02, 87.71 |
| <b>Functional Imaging</b>    |                           |                     |
| Renogram                     | 78707/8                   | 92.0, 92.03         |
| IVP                          | 74400/10/15               | 87.73               |
| <b>Procedures</b>            |                           |                     |
| Stent/drain                  | 52332, 50392/93, 74475/80 | 55.02, 55.03, 59.8, |
| Endoscopic                   | 52341/2/3/4/5/6, 50575    | 56.31               |
| Nephrectomy                  | 50545, 50220/25, 50370    | 55.51, 55.53        |
| Pyeloplasty                  | 50544, 50400, 50405       | 55.87               |
| Ureteropyelostomy            | 50740                     | 55.86               |
| Transplant                   | 50360/65/80               | 55.6, 55.61, 55.69  |
